# Supplementary material for: Engraftment of Human Pluripotent Stem Cell-derived Progenitors in the Inner Ear of Prenatal Mice
Source: PubMed Central journal article supplement (PMC5792596; doi:10.1038/s41598-018-20277-5), 2018-01-31
Supplement: 41598_2018_20277_MOESM1_ESM.pdf [file 41598_2018_20277_MOESM1_ESM.pdf]

# **Successful Engraftment of Human Pluripotent Stem Cell-derived Progenitors in the Inner Ear of Prenatal Mice**

Hiroki Takeda<sup>1</sup>, Makoto Hosoya<sup>2</sup>, Masato Fujioka<sup>2</sup>, Chika Saegusa<sup>2</sup>, Tsubasa Saeki<sup>2</sup>, Toru Miwa<sup>1,4</sup>, Hideyuki Okano<sup>3</sup> and Ryosei Minoda<sup>1,4\*</sup>.

<sup>1</sup>Departments of Otolaryngology-Head and Neck Surgery Kumamoto University, Graduate School of Medicine, 1-1-1 Honjo, Chuoku, Kumamoto city, Japan

<sup>2</sup>Departments of Otolaryngology-Head and Neck Surgery, Keio University School of Medicine, 35 Shinanomachi, Shinjuku-ku, Tokyo, Japan

<sup>3</sup>Department of Physiology, School of Medicine, Keio University, 35 Shinanomachi, Shinjuku, Tokyo, Japan.

<sup>4</sup>Departments of Otolaryngology-Head and Neck Surgery, Middle Ear and Inner Ear Surgical Center, JCHO Kumamoto General Hospital, 10-10 Tori Machi, Yatsushiro, Kumamoto, 866-8660, Japan

Corresponding author: Ryosei Minoda, Ph.D., M.D.

Departments of Otolaryngology-Head and Neck Surgery, Middle Ear and Inner Ear Surgical Center, JCHO Kumamoto General Hospital

Correspondence should be addressed to R.M. (ryminoda@gmail.com).

Corresponding author's address: 10-10, Tori Machi, Yatsushiro, Kumamoto, 866-8660, Japan

## Supplementary figures and figure legends

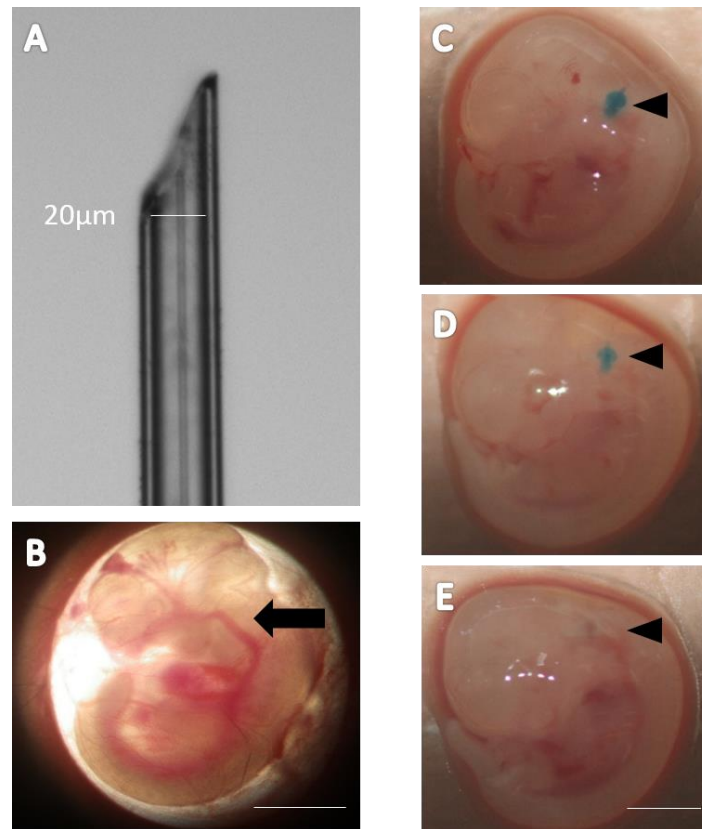

**Supplementary Figure 1.**

**(A)** The image of an ideally shaped glass micropipette for cell transplantation. The diameter of the tip is about 20  $\mu\text{m}$ . **(B)** Picture of a mouse embryo on E11.5 in the visceral yolk sac without the uterus. An arrow indicates the location of the otocyst. The bar indicates 1000  $\mu\text{m}$ . **(C-E)** Picture of a mouse embryo after fast green injection on E11.5 without the uterus, the visceral yolk sac, and the amnion. Arrowheads indicate the otocyst filled with fast green using a 20- $\mu\text{m}$  glass micro pipette (C) and a 30- $\mu\text{m}$  glass micro pipette (D), and the otocyst not filled with fast green using a 40- $\mu\text{m}$  glass micro pipette (E). The bar indicates 1000  $\mu\text{m}$ .

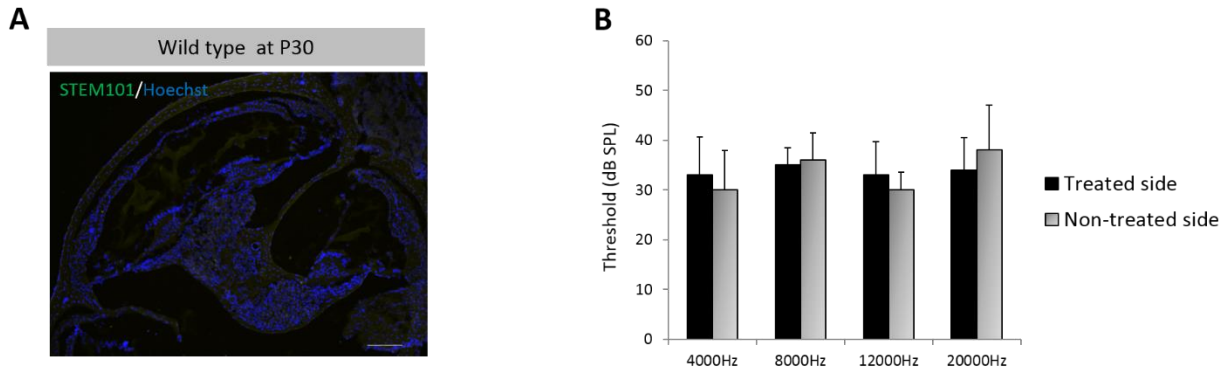

**Supplementary Figure 2.**

(A) The image shows the section of the treated cochlea on P30 in the WT-treated group. No transplanted cells were detectable. Green: STEM101; Blue: Hoechst. Scale bar indicates 100  $\mu$ m.

(B) ABR testing results on P30 after transplantation in the WT-treated group. No significant difference was found between the treated and the non-treated groups at 4, 8, 12, and 20 kHz. Each  $n=5$ .
